# Supplementary material for: Nonlytic cellular release of hepatitis A virus requires dual capsid recruitment of the ESCRT-associated Bro1 domain proteins HD-PTP and ALIX
Source: PubMed Central journal article supplement (PMC9410543; doi:10.1371/journal.ppat.1010543), 2022-08-15
Supplement: ppat.1010543.s003.pdf [file ppat.1010543.s003.pdf]

| Accession   | Host      | (gt) | Species | aa                  | VP1                                       | ***** PAD *****                           | ++   | pX    | +                     | +++++++ ExpD ++++++               | Pro-Arg                                   | 2B                        | aa               |       |     |
|-------------|-----------|------|---------|---------------------|-------------------------------------------|-------------------------------------------|------|-------|-----------------------|-----------------------------------|-------------------------------------------|---------------------------|------------------|-------|-----|
| NP_041007.1 | Human     | Ia   | A       | 750                 | FPRAPLNSNAMLS                             | --T--ESMSRIAAGDLESSVDDPRSEEDKRFESHIECRK   | ---- | P     | ----                  | YKELRLEVGGKRLKYAQEELSNEVLPPPRKMG  | -LFSQAKISLFY--                            | TEEHEIMKFSWRGVTADTRALRR   | 866              |       |     |
| BAA35102.1  | Human     | Ia   | A       | 750                 | FPRAPLNSNAMLS                             | --T--ESMSRIAAGDLESSVDDPRSEEDRRFESHIESRK   | ---- | P     | ----                  | YKELRLEVGGKRLKYAQEELSNEVLPPPRKIKG | -LFSQAKISLFY--                            | TEEHEIMKFSWRGVTADTRALRR   | 866              |       |     |
| AAF80114.1  | Human     | Ib   | A       | 750                 | FPRAPLNSNAMLP                             | --T--ESMSRIAAGDLESSVDDPRSEEDKRFESHIECRK   | ---- | P     | ----                  | YKELRLEVGGKRLKYAQEELSNEVLPPPRKMG  | -LFSQAKISLFY--                            | TEEHEIMKFSWRGVTADTRALRR   | 866              |       |     |
| AAU87586.1  | Human     | IIa  | A       | 750                 | FPRAPLNSNAMLS                             | --T--ETMMSRIAAGDLESSVDDPRSEEDRRFESHIESRK  | ---- | P     | ----                  | YKELRLEVGGKRLKYAQEELSNEVLPPPRKMG  | -LFSQAKISLFY--                            | TEEHEIMKFSWRGVTADTRALRR   | 866              |       |     |
| AAK44219.2  | Human     | IIb  | A       | 750                 | FPRAPLNSNAMLS                             | --T--ETMMSRIAAGDLESSVDDPRSEEDRRFESHIESRK  | ---- | P     | ----                  | YKELRLEVGGKRLKYAQEELSNEVLPPPRKMG  | -LFSQAKISLFY--                            | TEDHEIMKFSWRGVTADTRALRR   | 866              |       |     |
| BAF63620.1  | Human     | III  | A       | 750                 | FPRAPLNTNAMMS                             | --S--ETMDRIALGDLESSVDDPRSEEDKRFESHIEKRR   | ---- | P     | ----                  | YKELRLEVGGKRLKYAQEELSNEVLPPPRKIKG | -VFSQAKISLFY--                            | TEDHEIMKFSWKGITADTRALRR   | 866              |       |     |
| BAF63623.1  | Human     | III  | A       | 750                 | FPRAPLNTNAMMS                             | --S--ETMLDRIALGDLESSVDDPRSEEDKRFESHIEKRR  | ---- | P     | ----                  | YKELRLEVGGKRLKYAQEELSNEVLPPPRKIKG | -VFSQAKISLFY--                            | TEDHEIMKFSWKGITADTRALRR   | 866              |       |     |
| ANJ65975.1  | NHP       | V    | A       | 754                 | FPRAPLNSNAMMV                             | --S--ESMLDRIASGDLESSVDDPRSAEDKRFESHIEQ GK | ---- | P     | ----                  | YKELRMEVGGKRLKYAMEELSNEILPPPRKVKG | -LFSQAKISLFY--                            | TEDHEIMKFSWKGLTADTRALRR   | 870              |       |     |
| BAA00766.1  | NHP       | V    | A       | 754                 | FPRAPLNSNAMMV                             | --S--ESMLDRIASGDLESSVDDPRSAEDKRFESHIEQ GK | ---- | P     | ----                  | YKELRMEVGGKRLKYAMEELSNEILPPPRKVKG | -LFSQAKISLFY--                            | TEDHEIVKLSWKGLTADTRALRR   | 870              |       |     |
| ABX55994.1  | NHP       | V    | A       | 754                 | FPRAPLNSNAMMV                             | --S--ESMLDRIASGDLESSVDDPRSAEDKRFESHIEQ GK | ---- | P     | ----                  | YKELRMEVGGKRLKYAMEELSNEILPPPRKVKG | -LFSQAKISLFF--                            | TEDHEIVKLSWKGLTADTRALRR   | 870              |       |     |
| ALC78887.1  | Seal      | B    | 751     | FPRAPMNGVMMES       | ---VKSMDRRAMGDLESCVDDPRSEEDKKFEEQLTQEV    | [ 1 ]                                     | P    | ----  | YRSLRMKIGEHRIRYAKEEL  | -----HS-----                      | QAGPQDDPKDFSIMIRKLDKSI                    | IKG                       | 858              |       |     |
| ALR95870.1  | Tupaia    | H    | 749     | FPRAPLNNAMAES       | ---SR---VRRDLSEHVESVDDPKTDEEKKFEEELSNEI   | [ 9 ]                                     | P    | ----  | YRSLRMKIVGEQRLKYAQEEL | -----KNGLFS-----                  | QGNLVVDFAIYEKDIGNYTFRG                    |                           | 856              |       |     |
| ALL35262.1  | Rodent    | D    | 751     | FPRAPLNTNAMMETGT    | --TGIREEVARGLLESCVDDPRSLVDYQFERCVEARR     | ----                                      | P    | [ 2 ] | YKDLRLEIGKDRIDA       | AFEDLN-----                       | AIKGVMTQSGDEYYYWKMDSKLTLNLSLRQMSAEPKTI    | RR                        | 866              |       |     |
| ALL35267.1  | Rodent    | F    | 747     | FPRAPLNTNAMKI       | --S---IRMLDRISEGDLESSVDEIRSDIDLKFERNLESRR | ----                                      | P    | [ 3 ] | YKDLRMELGEMRMKQAFEDLN | -----                             | KGKLFQAGGNVILYSSEIDQAVKIGFTSLTLNPVAKRY    |                           | 859              |       |     |
| ALL35264.1  | Rodent    | D    | 750     | FPRAPLNTNAMAVGGG    | --TGIN---LQEMLESVDEPRDEEDFKFERCIESRK      | ----                                      | P    | [ 2 ] | YKDLRLEIGPDRIKAA      | YDDLN-----                        | QLKGLQITQAGGRLWFWKKDSKLTLDLDFSKMNAEPKVVRT |                           | 862              |       |     |
| ALL35274.1  | Rodent    | E    | 745     | FLRAPMNGVLKESDG     | -RMSVRARRALGDLESSVDDPRSDSDKKFQEISNEI      | [ 6 ]                                     | P    | [ 8 ] | YKDLRMDVGGKRLMKYQESL  | -----                             | RKRKERETN-----                            | FV-----                   | SQSSFQDFLLGKKT-- | CPYRA | 864 |
| ALL35270.1  | Hedgehog  | H    | 746     | FPRAPLNNFAMNAT      | ---SR---STRSIQDMVESVDDPKTKEDREFEELSNEI    | [ 11 ]                                    | P    | ----  | YRSLRMKVAEQRLKYAKEELN | --RPFS-----                       | QTHKVVNFVYEREESQILRG                      |                           | 852              |       |     |
| ALL35265.1  | Shrew     | I    | 744     | FPRAPLDNSKLQEYPN    | -SNNIMREEC---VLESSVDAPPQP                 | -----                                     | P    | [ 8 ] | YRELRLLEVGGQLRLEQA    | KKDFD-ESKHKYNQVKKETKAK            | -FLKQAAkvtNEILEGGVYTQALLKDGNY             | IKK                       | 856              |       |     |
| AWK22878.1  | Opossum   | F    | 751     | FPRAPLNSNAMKT       | --S---TGVMARISEGDLESCVDEVRDESDFEFERNLESRR | ----                                      | P    | [ 3 ] | YKEARLELQGMQIRQAL     | EDL-----                          | RAKVCSSQSGP-ISLfy                         | CELDEPIDVSLRGVAMRPNTKRR   |                  | 861   |     |
| AVJ35641.1  | Bat       | H    | 749     | FPRAPLNNALGET       | ---TTRLTRDLGDRVESAVDDPKTPEDKKFEEELSNEI    | [ 11 ]                                    | P    | ----  | YRSLRLAIGEKRRLQYAKEEL | -----                             | KLQS-----                                 | QAGSSVTPNFISIFGKKEENKRVKS |                  | 858   |     |
| *ALL35271.1 | Bat (M32) | H    | 749     | FPRAPLNNAI TET      | ---PS---LL-DFSMDVESVDDPKSEEDKKFEEDLANEV   | [ 11 ]                                    | P    | ----  | YKSLRMKVGGEYRLKYAQEEL | QKNKLYT-----                      | QASTVVNFVDVYEKDIGNHVFRG                   |                           | 856              |       |     |
| *ALL35275.1 | Bat (SMG) | C    | 757     | FMRAPLNNAVMHESDGRAV | SVRTRREAGDLESSVDDPRTKEDREFENEISKQ         | [ 13 ]                                    | P    | ----  | YKDVRMEVGGKMRMKYAREEW | -----                             | ERMKEKRKSGEMSNFIDDTYmaHS                  | IGNLADYSVVKRLVNGETIRG     |                  | 888   |     |

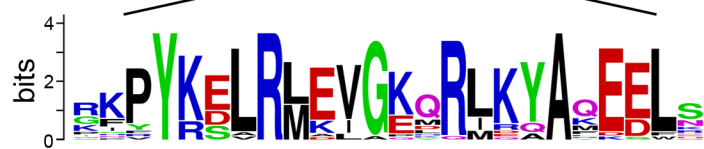

|            |     |   |     |                                       |                |              |       |              |            |             |     |     |
|------------|-----|---|-----|---------------------------------------|----------------|--------------|-------|--------------|------------|-------------|-----|-----|
| ALL35272.1 | Bat | G | 750 | FPRAPLNN TAVVETPN-STNIMARIQMGDLESCVDS | SDSSE-----     | YEKL         | ----- | ESQSGDSSPKNF | SIMTRTSNGT | IMKG        |     | 818 |
| ALL35273.1 | Bat | G | 753 | FPRAPLNNNAVMDTP-DSHNM                 | CRIAAGDLESCVDS | SVGSSDF----- |       | EDIEQTQSGAD  | IKNF       | SIVSREEENRI | IKG | 822 |
