# Supplementary material for: Nonlytic cellular release of hepatitis A virus requires dual capsid recruitment of the ESCRT-associated Bro1 domain proteins HD-PTP and ALIX
Source: PubMed Central journal article supplement (PMC9410543; doi:10.1371/journal.ppat.1010543), 2022-08-15

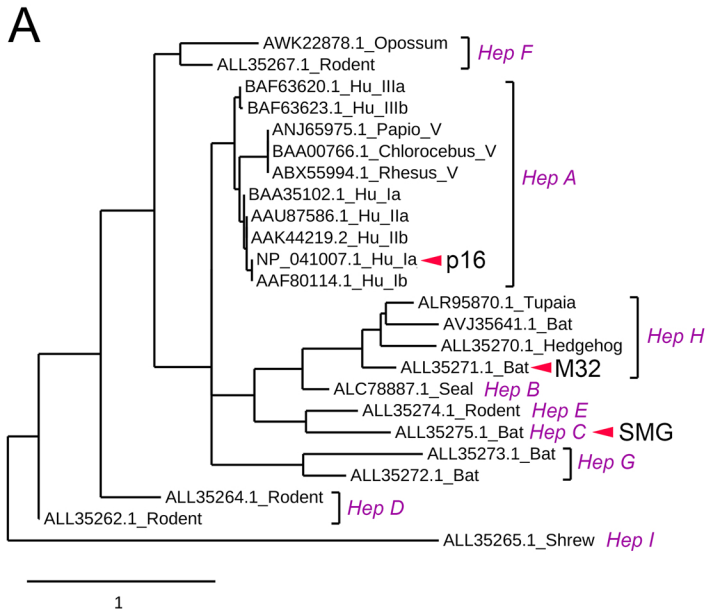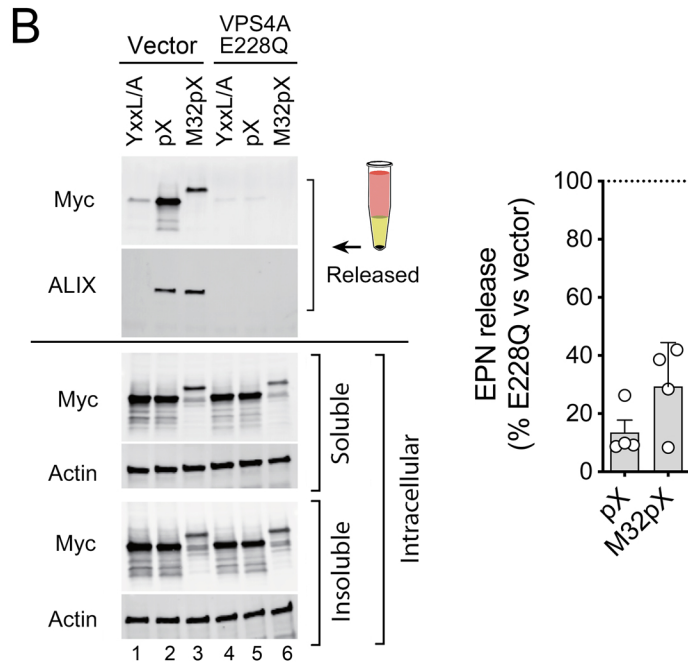

Supplement: ppat.1010543.s004.pdf [file ppat.1010543.s004.pdf]
