# Supplementary material for: Nonlytic cellular release of hepatitis A virus requires dual capsid recruitment of the ESCRT-associated Bro1 domain proteins HD-PTP and ALIX
Source: PubMed Central journal article supplement (PMC9410543; doi:10.1371/journal.ppat.1010543), 2022-08-15
Supplement: ppat.1010543.s007.pdf [file ppat.1010543.s007.pdf]

**A** HAV + ALIX + HD-PTP

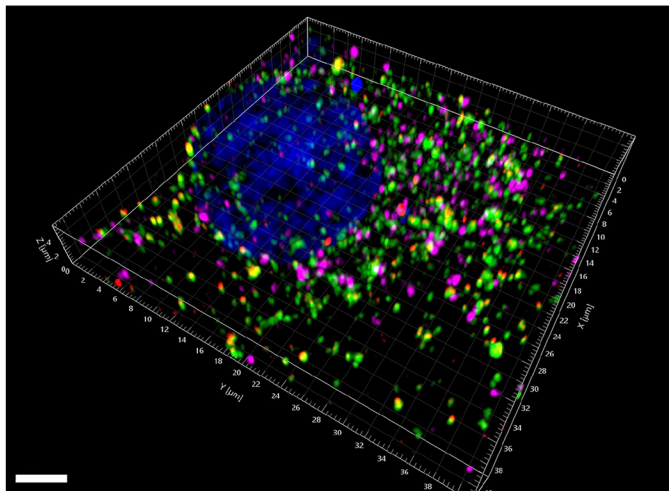

5  $\mu\text{m}$

**B** HAV + ALIX + HD-PTP

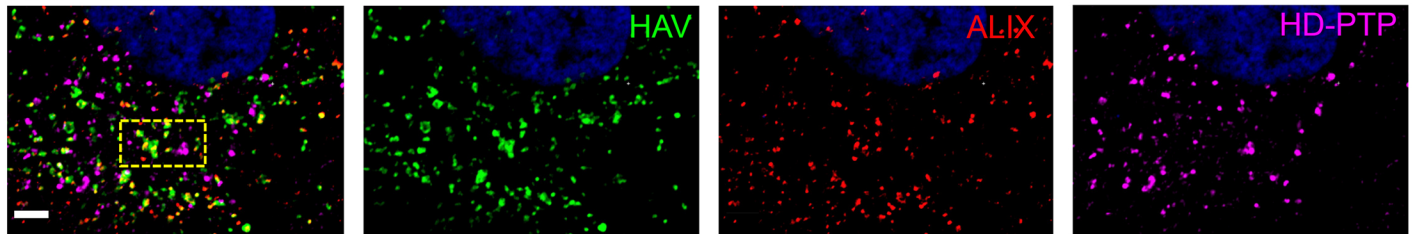

3  $\mu\text{m}$

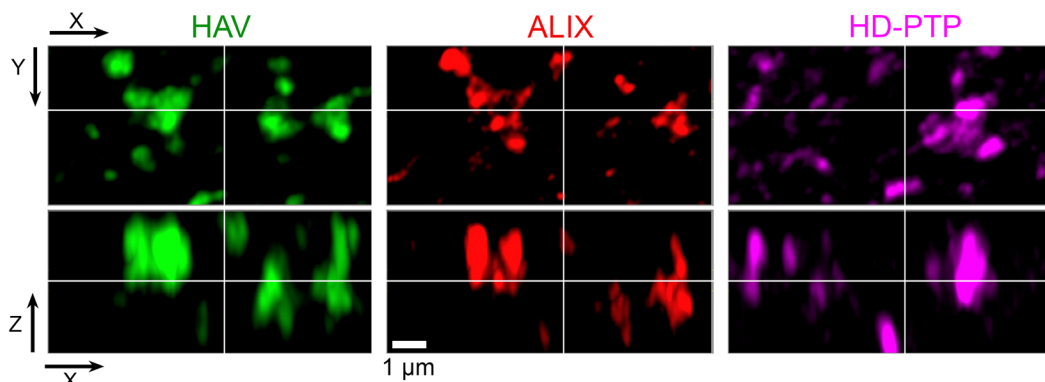

1  $\mu\text{m}$

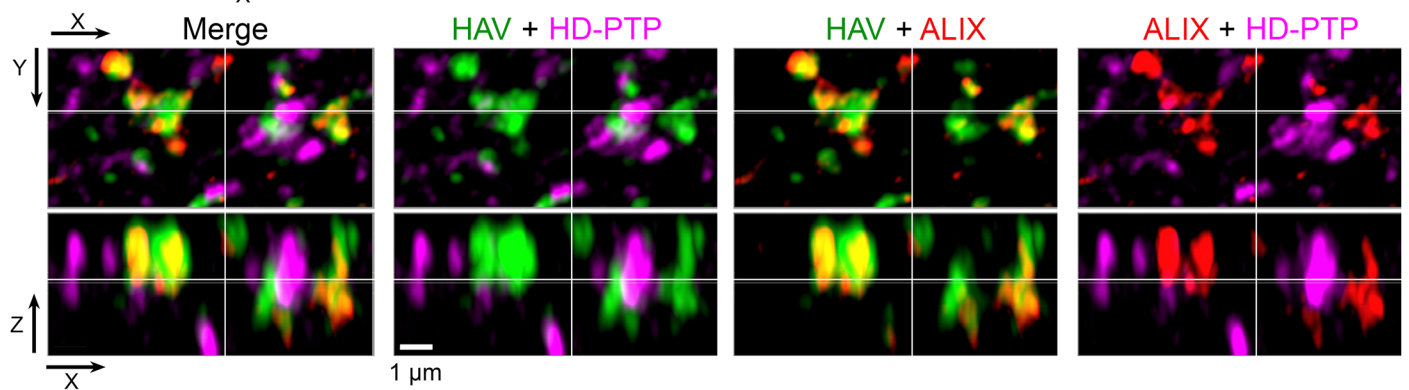

1  $\mu\text{m}$
