# Supplementary material for: Nonlytic cellular release of hepatitis A virus requires dual capsid recruitment of the ESCRT-associated Bro1 domain proteins HD-PTP and ALIX
Source: PubMed Central journal article supplement (PMC9410543; doi:10.1371/journal.ppat.1010543), 2022-08-15
Supplement: ppat.1010543.s009.pdf [file ppat.1010543.s009.pdf]

**Table S2.** Oligonucleotides used in this study.

| Primer                                    | 5'-Sequence-3'                                                      | Purpose                                                                                                                                                                                                                  |
|-------------------------------------------|---------------------------------------------------------------------|--------------------------------------------------------------------------------------------------------------------------------------------------------------------------------------------------------------------------|
| pX-F                                      | ATTTCGTGGCTGCACCGAACAGAAGCTGATCTCCGAAGAAGACCTGATGATGAGCAGAATTG      | Replacing HIV p6 <sup>Gag</sup> sequence with full-length, N-terminus (Pentamer domain), C-terminus ( $\Delta$ PAD), secretion region (SecD) of HAV pX, or YPX <sub>3L</sub> tandem late domains containing VP2 fragment |
| pX $\Delta$ PAD-F                         | ATTTCGTGGCTGCACCGAACAGAAGCTGATCTCCGAAGAAGACCTGATGATGAGCAGAATTG      |                                                                                                                                                                                                                          |
| pX $\Delta$ 123-R                         | GGCAGAGGGGAAAAAGATCTGCTAGCAAGCTTCTCGAGTCAACTCTCAAATCTTTTATCT        |                                                                                                                                                                                                                          |
| pX/ $\Delta$ 1/ $\Delta$ 2/ $\Delta$ 3-R2 | GGCAGAGGGGAAAAAGATCTGCTAGCAAGCTTCTCGAGTCATTGTGAAACAGTCC             |                                                                                                                                                                                                                          |
| SecD-F                                    | ATTTCGTGGCTGCACCGAACAGAAGCTGATCTCCGAAGAAGACCTGAGGAAGCCATAT          |                                                                                                                                                                                                                          |
| SecD-R                                    | GGCAGAGGGGAAAAAGATCTGCTAGCAAGCTTCTCGAGTCATGACAAATCTTCC              |                                                                                                                                                                                                                          |
| VP2LD-F                                   | ATTTCGTGGCTGCACCGAACAGAAGCTGATCTCCGAAGAAGACCTGCTGGTGACCAGAGCTAT     |                                                                                                                                                                                                                          |
| VP2LD-R                                   | GGCAGAGGGGAAAAAGATCTGCTAGCAAGCTTCTCGAGTCATCCTGTCCCAATATTTAATTCTGACC |                                                                                                                                                                                                                          |
| EPN01-Seq                                 | GAATGGTTCAAAGCGGGC                                                  |                                                                                                                                                                                                                          |
| $\Delta$ HIVM2-5 F                        | TATATGGTACCATGGGTTCTAAATCTGGCTCCGGC                                 |                                                                                                                                                                                                                          |
| $\Delta$ HIVM2-link F                     | TATATGGTACCATGAAGATCGAAGAGCTGTTCAAGA                                |                                                                                                                                                                                                                          |
| $\Delta$ HIVM2-5 R                        | TGGATGGTACCTCCGGATCGATAAATCTAG                                      |                                                                                                                                                                                                                          |
| pX $\Delta$ 1a-F                          | TGAGGGATCCGAAGTTGGGAAACAAAGACTCAAGTATGC                             |                                                                                                                                                                                                                          |
| pX $\Delta$ 1a-R                          | TGAGGGATCCACTCTCAAATCTTTTATCTTCCCTCTGATCTAGG                        |                                                                                                                                                                                                                          |
| pX $\Delta$ 2a-F                          | TGAGGGATCCGAAGAATTGTCAAATGAAGTACTTCCACC                             |                                                                                                                                                                                                                          |
| pX $\Delta$ 2a-R                          | TGAGGGATCCTAATCTCAGTTCTTTATATGGCTTCCCTGC                            |                                                                                                                                                                                                                          |
| EPN01-seq2                                | AAATGGGCGGTAGGCGTGTA                                                |                                                                                                                                                                                                                          |
| VP4/7-11 F                                | GAATTATCGATCCGGAGGTACCATGGGTATTTTCCAGACTGGTTCTAAATCTGGCTCCGGCTCTG   | Cloning sequences with different length of HAV VP4 to EPN-pX                                                                                                                                                             |
| VP4/7-11 R                                | CAGAGCCGGAGCCAGATTTAGAACCAGTCTGGAAAATACCCATGGTACCTCCGGATCGATAATTC   |                                                                                                                                                                                                                          |
| VP4/3-11 F                                | GAATTATCGATCCGGAGGTACCATGTCTAGACAAGGTATTTTCCAGACTGGTTCTA            |                                                                                                                                                                                                                          |
| VP4/3-11 R                                | TAGAACCAGTCTGGAAAATACCTTGTCTAGACATGGTACCTCCGGATCGATAATTC            |                                                                                                                                                                                                                          |
| VP4/1-11 F                                | GAATTATCGATCCGGAGGTACCATGAACATGTCTAGACAAGGTATTTTCCAGACTGGTTCTA      |                                                                                                                                                                                                                          |
| VP4/1-11 R                                | TAGAACCAGTCTGGAAAATACCTTGTCTAGACATGTTTCATGGTACCCTCCGGATCGATAATTC    |                                                                                                                                                                                                                          |
| YxxL/A-F                                  | GAGAGTCATATAGAATGCAGGAAGCCAGCTGCAGCAGCGAGATTAGAAGTTGGGAAACAAAGACTC  | Constructing Ala substitutions at the YxxL motif in EPN-pX                                                                                                                                                               |
| YxxL/A-R                                  | GAGTCTTTGTTTCCCAACTTCTAATCTCGCTGCTGCAGCTGGCTTCTGCATTCTATATGACTCTC   |                                                                                                                                                                                                                          |
| KQ1/A-F                                   | GCCATATAAAGAAGTCTGAGATTAGAAGTTGCGGCAGCAAGACTCAAGTATGCTCAGGAAGAATTG  | Constructing Ala substitutions at the KFERQ-like motifs in EPN-pX                                                                                                                                                        |
| KQ1/A-R                                   | CAATTCTTCTGAGCATACTTGAGTCTTGCTGCCGCAACTTCTAATCTCAGTTCTTTATATGGC     |                                                                                                                                                                                                                          |
| KQ2/A-F                                   | GATTAGAAGTTGGGAAACAAAGACTCAAGGCTGCTGCCGAAGAATTGTCAAATGAAGTACTTCCACC |                                                                                                                                                                                                                          |

|              |                                                                           |                                                      |
|--------------|---------------------------------------------------------------------------|------------------------------------------------------|
| KQ2/A-R      | GGTGGGAAGTACTTCATTTGACAATTCTTCCGCAGCAGCCTTGAGTC<br>TTTGTTCCTCCAACTTCTAATC |                                                      |
| KQ1,2/A-F    | GAAGTTGCGGCAGCAAGACTCAAGGCTGCTGCGGAAGAATTGTCAA<br>ATGAAGTACTTCCACC        |                                                      |
| KQ1,2/A-R    | GGTGGGAAGTACTTCATTTGACAATTCTTCCGCAGCAGCCTTGAGTC<br>TTGCTGCCGCAACTTC       |                                                      |
| ALIX1-F      | CCCACCATGTACCCATACGATGTTCCAGATTACGCTatggcgacat<br>tcatctcggg              | Inserting coding<br>sequence of ALIX into<br>pCMV-HA |
| ALIX65-F     | CCCACCATGTACCCATACGATGTTCCAGATTACGCTctcgagacgc<br>tcctgag                 |                                                      |
| ALIX135-F    | CCCACCATGTACCCATACGATGTTCCAGATTACGCTgcagcagaac<br>agaacctgg               |                                                      |
| ALIX210-F    | CCCACCATGTACCCATACGATGTTCCAGATTACGCTgatgccatca<br>tagctaaattggc           |                                                      |
| ALIX361-F    | CCCACCATGTACCCATACGATGTTCCAGATTACGCTGTGTCAGTAC<br>AGCAGTCTTTGG            |                                                      |
| ALIX360-R*   | TCGACCGAATTCGGGCCTCCATGGCCATAAGTCAGGGAACCATCTT<br>CTCAAACAGATC            |                                                      |
| ALIX702-R*   | TCGACCGAATTCGGGCCTCCATGGCCATAAGTCATCTTTCTGTCTT<br>CCGTGCAA                |                                                      |
| ALIX868-R*   | TCGACCGAATTCGGGCCTCCATGGCCATAAGTCACTGCTGTGGATA<br>GTAAGACTGC              |                                                      |
| p16-SacI     | CCCACCATGTACCCATACGATGTTCCAGATTACGCTGAGCTCCATT<br>GAACTCAA                |                                                      |
| p16-EcoRI    | TCGACCGAATTCGGGCCTCCATGGCCATAAGCTCCATGAATTCAGT<br>CATGT                   |                                                      |
| p16/VP1-seqf | CACTGGATGGTTTGGGAGAC                                                      |                                                      |
| p16/3B-seqr  | TTACACCATGATATACCCCTTCA                                                   |                                                      |

\*Red letters = stop codon
