# Supplementary material for: Nonlytic cellular release of hepatitis A virus requires dual capsid recruitment of the ESCRT-associated Bro1 domain proteins HD-PTP and ALIX
Source: PubMed Central journal article supplement (PMC9410543; doi:10.1371/journal.ppat.1010543), 2022-08-15
Supplement: ppat.1010543.s010.pdf [file ppat.1010543.s010.pdf]

**Table S3.** Antibodies used in this study.

| <b>Antibody</b>                | <b>Source</b>                   | <b>RRID</b>      |
|--------------------------------|---------------------------------|------------------|
| Mouse anti-Myc, clone 4A6      | EMD Millipore Cat# 05-724       | RRID:AB_568800   |
| Rabbit anti-HA-Tag clone C29F4 | Cell Signaling Cat# 3724        | RRID:AB_1549585  |
| Rat anti-HA clone 3F10         | Roche Cat# 11867423001          | RRID:AB_390918   |
| Mouse anti- DYKDDDDK Tag       | Cell Signaling Cat# 8146        | RRID:AB_10950495 |
| Mouse anti-ALIX-488 clone 1A12 | Santa Cruz Cat# sc-53540        | RRID:AB_673819   |
| Rabbit anti-ALIX clone E6P9B   | Cell Signaling Cat# 92880       | RRID:AB_2800192  |
| Rabbit anti-PTPN23 (HD-PTP)    | Proteintech Cat# 10472-1-AP     | RRID:AB_2173382  |
| Mouse anti-LAMP1 clone D401S   | Cell Signaling Cat# 15665       | RRID:AB_2798750  |
| Mouse anti-HAV clone K24F2     | Commonwealth Serum Laboratories | RRID:AB_2868526  |
| Guinea pig anti-VP1 #501       | Gift from David Sangar          | N/A              |
| Human polyclonal anti-HAV JC   | Lemon laboratory [1]            | RRID:AB_2868527  |
| Rabbit anti-GLuc               | New England Biolabs Cat# E8023S | RRID:AB_1929564  |
| Rabbit anti-Actin              | Sigma-Aldrich Cat# A2066        | RRID:AB_476693   |
| Mouse anti-Actin clone C-2     | Santa Cruz Cat# sc-8432         | RRID:AB_626630   |
